# Supplementary material for: High-resolution quantitative imaging of mammalian and bacterial cells using stable isotope mass spectrometry
Source: PubMed Central journal article supplement (PMC1781526; doi:10.1186/jbiol42), 2006-10-05
Supplement: jbiol42-s1.pdf [file jbiol42-s1.pdf]

## Additional File 1: Estimation of the volume sputtered, useful ion yield and detectability limit

We will illustrate below how we will estimate the volume sputtered, the useful yield and the detectability limit.

|                                                |                                                         |
|------------------------------------------------|---------------------------------------------------------|
| Field analyzed                                 | $6 \mu\text{m} \times 6 \mu\text{m} = 36 \mu\text{m}^2$ |
| Cs <sup>+</sup> beam intensity                 | $\sim 0.40 \text{ pA}$                                  |
| or                                             | $2.5 \times 10^6 \text{ ions Cs}^+\text{s}^{-1}$        |
| Dwell time/pixel                               | 20 ms                                                   |
| Number of pixels                               | 256 x 256                                               |
| Acquisition time                               | 1310 s                                                  |
| Total dose (TD)                                | $3.27 \times 10^9 \text{ Cs}^+ \text{ ions}$            |
| Dose/ $\mu\text{m}^2$                          | $9.10 \times 10^7 \text{ Cs}^+ \text{ ions}$            |
| Dose / surface atom                            | 5.94 $\sim$ <b>6 Cs<sup>+</sup> ions / surface atom</b> |
| Sputtering efficiency <sup>a</sup>             | 5 target atoms / Cs <sup>+</sup>                        |
| → Total number of atoms sputtered <sup>b</sup> | $1.64 \times 10^{10}$                                   |
| Atomic density <sup>c</sup>                    | $6.00 \times 10^{10} \text{ atoms} / \mu\text{m}^3$     |
| Thickness of one atomic layer                  | $2.55 \times 10^{-4} \mu\text{m}$                       |
| Number of atoms / $\mu\text{m}^2$ in one layer | $1.53 \times 10^7$                                      |
| → Sputtered volume for TD                      | $0.27 \mu\text{m}^3$ (1)                                |
| or Sputtered thickness                         | $7.59 \times 10^{-3} \mu\text{m} \sim$ <b>8 nm</b>      |
| or Atomic layers                               | $2.97 \times 10^1 \sim$ <b>30 layers</b>                |

---

a Supported by many measurements in material sciences. The measured values approximately range between 3 target atoms/Cs<sup>+</sup> for <sup>12</sup>C to 20 target atoms/Cs<sup>+</sup> for <sup>197</sup>Au.

b For one series of parallel images.

c Lower estimate calculated from concentration of H, N, O and P in dry biological tissue and excluding embedding medium.

The useful ion yield for detecting nitrogen can be estimated; in the above conditions

|                                                                   |                                                                           |
|-------------------------------------------------------------------|---------------------------------------------------------------------------|
| Dose / pixel                                                      | $\sim 5.00 \times 10^4$ Cs <sup>+</sup> ions;                             |
| they sputter                                                      | $2.5 \times 10^5$ atoms / pixel                                           |
| Nitrogen atomic concentration in the sample <sup>a</sup>          | $5.00 \times 10^{-2}$                                                     |
| → Nitrogen atoms sputtered / pixel:                               | $1.25 \times 10^4$                                                        |
| Signal intensity for <sup>12</sup> C <sup>14</sup> N <sup>-</sup> | 2000 ions / pixel <sup>b</sup>                                            |
| → Useful yield                                                    | <b><math>1.6 \times 10^{-1}</math> CN<sup>-</sup> ion / target N atom</b> |
| Minimum detectable:                                               |                                                                           |
| Atomic density                                                    | $6.00 \times 10^{10}$ atoms / $\mu\text{m}^3$                             |
| Useful yield <sup>c</sup>                                         | $1.0 \times 10^{-1}$ ion / atom                                           |
| 30 sputtered atoms                                                | → 3.0 ions (mean)                                                         |
| probability of 0 ion detected                                     | 5%                                                                        |
| probability for detecting a least 1 ion                           | 95%                                                                       |
| From (1), volume analyzed                                         | $0.27 \mu\text{m}^3$                                                      |
| Number of atoms                                                   | $1.62 \times 10^{10}$                                                     |
| Minimum detectable                                                | $1.85 \times 10^{-9}$ <b>~ 2 ppb</b>                                      |

a Estimated from concentrations of H,C, N, O, P in dry biological tissues.

b Experimental data. Preliminary results.

c Under estimate from our experimental conditions.

Assume now,

Analyzed diameter

100 nm

Thickness

10 nm

→ Volume

$7.85 \times 10^{-5} \mu\text{m}^3$

Number of atoms

$4.71 \times 10^6$

Minimum detectable

$6.37 \times 10^{-6}$      **~ 7 ppm**
