# Supplementary material for: High-resolution quantitative imaging of mammalian and bacterial cells using stable isotope mass spectrometry
Source: PubMed Central journal article supplement (PMC1781526; doi:10.1186/jbiol42), 2006-10-05
Supplement: jbiol42-s5.pdf [file jbiol42-s5.pdf]

### Additional File 5: MIMS analysis vs. $^{14}\text{C}$ Autoradiography

$$N = N_0 e^{-\gamma t}$$

where  $N_0$  is the number of atoms at time 0  
and  $N$  number of atoms after radioactive decay time  $t$

$$\gamma = \text{decay constant}; \gamma = 0.693/T_{1/2}$$

$$^{14}\text{C } t_{1/2} = 5715 \text{ years} \quad \gamma = 2.3 \times 10^{-10} \text{ per minute}$$

#### Number of radioactive $^{14}\text{C}$ atoms in 1 $\mu\text{C}$ :

$$1 \mu\text{C} = 2.22 \times 10^6 \text{ dpm}$$

$$N = N_0 \exp(-2.3 \times 10^{-10})$$

$$\text{After 1 minute: } N = N_0 - 2.22 \times 10^6$$

$$N_0 - (2.22 \times 10^6) = N_0 \exp(-2.3 \times 10^{-10})$$

$$N_0 = 9.56 \times 10^{15}$$

#### Fraction of $^{14}\text{C}$ atoms disintegrated in 1 minute per $\mu\text{C}$ :

Thus, even if only 1% of the  $^{14}\text{C}$  atoms were sputtered and if only 1% of the sputtered atoms were ionized,

the number of secondary  $^{14}\text{C}^-$  ions would be  $9.56 \times 10^{10}$

and the efficiency of MIMS would be

$$9.56 \times 10^{10} / 2.22 \times 10^6$$

or approximately  $5 \times 10^4$  fold higher than that of autoradiography.
